# Supplementary material for: Twenty-one years of hydrological data acquisition in the Mediterranean Sea: quality, availability, and research
Source: Copernicus journal article supplement (doi:10.5194/essd-2022-168), 2022-05-31
Supplement: Supplementary file [file essd-2022-168-RC1-supplement.pdf]

The manuscript is well and clearly written and is fluent and easy to read. The content and data fit the objectives of the ESSD journal. For these reasons, I support its publication. I would like to add just a couple of comments that may help to clarify the text:

Line 206: substitute “due to” with “by”;

Line 208: Explain why you expect to find staircases away from the eddies, or why you don't expect to find them in the eddies;

Line 220: add in the text the typical thermohaline properties of the nWMDW;

Figure 4: add the track of these casts.
